# Supplementary material
Source: PubMed Central journal article supplement (PMC3947269)
Supplement: NIHMS536075-supplement-1.pdf [file NIHMS536075-supplement-1.pdf]

Direct assessment of hepatic mitochondrial oxidative and anaplerotic fluxes in humans using dynamic  $^{13}\text{C}$  magnetic resonance spectroscopy

Douglas E. Befroy, Rachel J. Perry, Nimit Jain, Sylvie Dufour, Gary W. Cline, Jeff Trimmer, Julia Brosnan, Douglas L. Rothman, Kitt Falk Petersen and Gerald I. Shulman

## Supplemental Information

**Table S1.** Morphological characteristics and intrahepatic lipid (IHL) content for the subjects participating in the study.

|                                            | n  | Mean | SEM    |
|--------------------------------------------|----|------|--------|
| <b>Age (yr)</b>                            | 12 | 28.3 | ± 2.0  |
| <b>Height (m)</b>                          | 12 | 1.76 | ± 0.02 |
| <b>Weight (kg)</b>                         | 12 | 70.1 | ± 2.7  |
| <b>BMI (<math>\text{kg m}^{-2}</math>)</b> | 12 | 22.7 | ± 0.5  |
| <b>IHL (%)</b>                             | 12 | 1.09 | ± 0.19 |

**Figure S1.** Representative Monte Carlo simulations and probability distribution analysis for the modeled rates of hepatic TCA cycle flux ( $V_{TCA}$ ) and anaplerosis ( $V_{ANA}$ ) for a single subject.

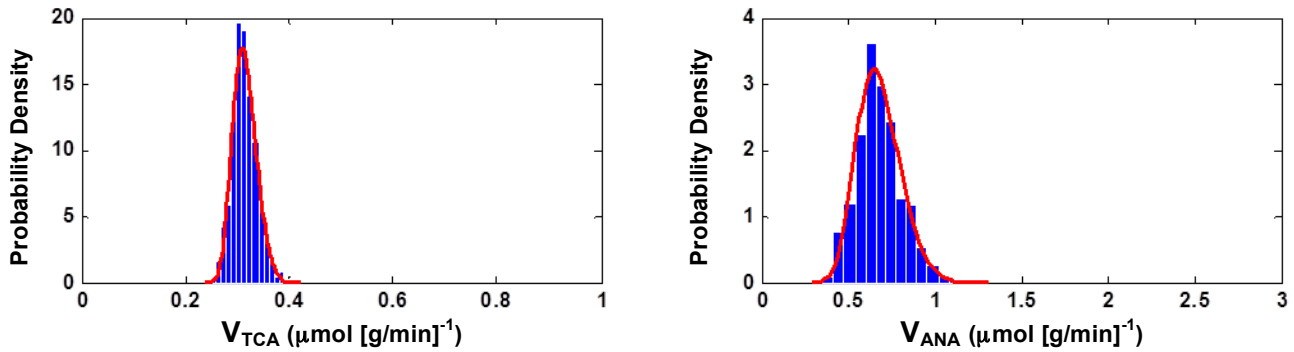

**Figure S2.** Scatter plots of  $V_{TCA}$ ,  $V_{ANA}$  and  $V_{ANA}/V_{TCA}$  data for the individual subjects ( $n = 12$ , gray diamonds); the group mean (black line) and SEM of the data are superimposed.

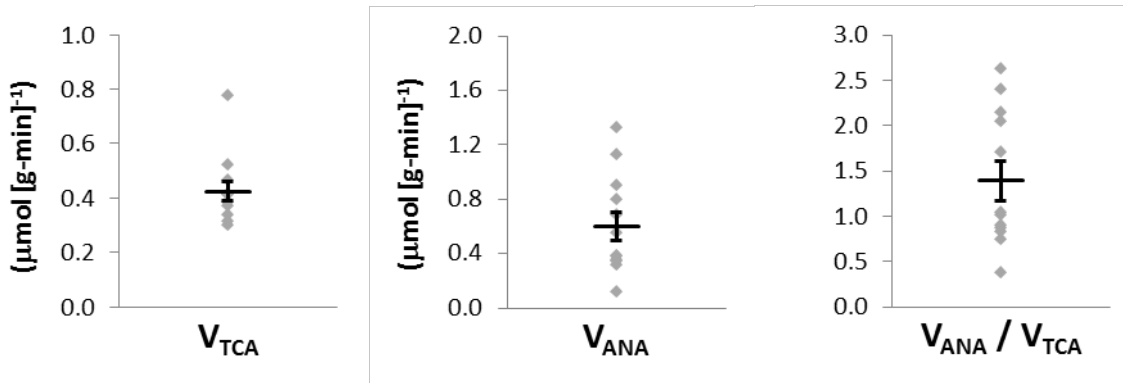

**Isotopic and mass balance differential equations used in the metabolic modeling analysis**

$$\frac{dC_1AcCoA}{dt} = V_{DIL} \left( \frac{\text{unlabeled } \square FA}{FA} \right) + V_{AC} \left( \frac{C_1Acetate}{Acetate} \right) - V_{TCA} \left( \frac{C_1AcCoA}{AcCoA} \right)$$

$$\frac{dC_5Citrate}{dt} = V_{TCA} \left( \frac{C_1AcCoA}{AcCoA} \right) - V_{TCA} \left( \frac{C_5Citrate}{Citrate} \right)$$

$$\frac{dC_5\alpha KG}{dt} = V_{TCA} \left( \frac{C_5Citrate}{Citrate} \right) + V_X \left( \frac{C_5Glutamate}{Glutamate} \right) - [V_{TCA} + V_X] \left( \frac{C_5\alpha KG}{\alpha KG} \right)$$

$$\frac{dC_5Glutamate}{dt} = V_X \left( \frac{C_5\alpha KG}{\alpha KG} \right) - V_X \left( \frac{C_5Glutamate}{Glutamate} \right)$$

$$\frac{dC_4Malate}{dt} = \frac{V_{TCA}}{2} \left( \frac{C_5\alpha KG}{\alpha KG} \right) + \frac{V_{TCA}}{2} \left( \frac{\text{unlabeled } \square \alpha KG}{\alpha KG} \right) - V_{TCA} \left( \frac{C_4Malate}{Malate} \right)$$

$$\frac{dC_1Malate}{dt} = \frac{V_{TCA}}{2} \left( \frac{C_5\alpha KG}{\alpha KG} \right) + \frac{V_{TCA}}{2} \left( \frac{\text{unlabeled } \square \alpha KG}{\alpha KG} \right) - V_{TCA} \left( \frac{C_1Malate}{Malate} \right)$$

$$\frac{dC_4OAA}{dt} = V_{TCA} \left( \frac{C_4Malate}{Malate} \right) + V_{ANA} \left( \frac{*CO_2}{CO_2} \right) + V_X \left( \frac{C_4Aspartate}{Aspartate} \right) - (V_{TCA} + V_{ANA} + V_X + V_{FUM}) \left( \frac{C_4OAA}{OAA} \right) + V_{FUM} \left( \frac{C_1OAA}{OAA} \right)$$

$$\frac{dC_1OAA}{dt} = V_{TCA} \left( \frac{C_1Malate}{Malate} \right) + V_{ANA} \left( \frac{\text{unlabeled } \square Pyruvate}{Pyruvate} \right) + V_X \left( \frac{C_1Aspartate}{Aspartate} \right) - (V_{TCA} + V_{ANA} + V_X + V_{FUM}) \left( \frac{C_1OAA}{OAA} \right) + V_{FUM} \left( \frac{C_4OAA}{OAA} \right)$$

$$\frac{dC_4Aspartate}{dt} = V_X \left( \frac{C_4OAA}{OAA} \right) - V_X \left( \frac{C_4Aspartate}{Aspartate} \right)$$

$$\frac{dC_1Aspartate}{dt} = V_X \left( \frac{C_1OAA}{OAA} \right) - V_X \left( \frac{C_1Aspartate}{Aspartate} \right)$$

$$\frac{dC_1Citrate}{dt} = V_{TCA} \left( \frac{C_4OAA}{OAA} \right) - V_{TCA} \left( \frac{C_1Citrate}{Citrate} \right)$$

$$\frac{dC_6Citrate}{dt} = V_{TCA} \left( \frac{C_1OAA}{OAA} \right) - V_{TCA} \left( \frac{C_6Citrate}{Citrate} \right)$$

$$\frac{dC_1\alpha KG}{dt} = V_{TCA} \left( \frac{C_1Citrate}{Citrate} \right) + V_X \left( \frac{C_1Glutamate}{Glutamate} \right) - [V_{TCA} + V_X] \left( \frac{C_1\alpha KG}{\alpha KG} \right)$$

$$\frac{dC_1Glutamate}{dt} = V_X \left( \frac{C_1\alpha KG}{\alpha KG} \right) - V_X \left( \frac{C_1Glutamate}{Glutamate} \right)$$

$$V_{TCA} = V_{DIL} + V_{AC}$$

$$V_{DIL} = V_{PDH} + V_{FA}$$

$$V_{ANA} = V_{PEPCK} = V_{PC}$$

$$\left( \frac{*CO_2}{CO_2} \right) = \left( \frac{H *CO_3}{HCO_3} \right)$$

### **Methodological validation: animal experiments**

To validate the methodological approaches described in this article, analogous experiments were performed *ex vivo* in rat liver. All experiments were performed in compliance with protocols approved by the Yale University Institutional Animal Care and Use Committee.

#### **<sup>13</sup>C MRS assessment of hepatic TCA Cycle Flux**

Adult (8-10 week), male *Sprague-Dawley* rats ( $n = 34$ ) underwent a 2-step primed-continuous infusion of [ $1-^{13}\text{C}$ ] acetate for varying durations up to 120 minutes [prime 1:  $358 \mu\text{mol (kg-min)}^{-1} \times 5 \text{ min}$ , prime 2:  $178 \mu\text{mol (kg-min)}^{-1} \times 5 \text{ min}$ , continuous:  $130 \mu\text{mol (kg-min)}^{-1} \times 110 \text{ min}$ ]. Blood samples were drawn at regular intervals throughout the infusion protocol to assess plasma acetate concentration and [ $1-^{13}\text{C}$ ] enrichment by gas chromatography-mass spectrometry (GC/MS). At the end of each infusion the liver was excised and immediately freeze-clamped with liquid nitrogen. The relative, positional  $^{13}\text{C}$ -enrichments of glutamate were determined by  $^{13}\text{C}$ -NMR of liver extracts at 500MHz; total  $^{13}\text{C}$ -enrichment and glutamate concentration were determined by liquid-chromatography–mass-spectrometry–mass spectrometry (LC/MS/MS). Composite time courses of hepatic glutamate enrichment were fitted as individual points to the metabolic model of the TCA cycle as described for the human experiments in the **Online Methods**. TCA cycle flux is reported as the best fit  $\pm$  the SD of the fit.

#### **Assessment of glucose turnover in vivo in awake rats**

Rats ( $n = 4$ ) were infused for 120min with [ $3-^3\text{H}$ ] glucose using a 1-step primed-continuous protocol as described by Rosetti *et al*<sup>1</sup>. Plasma samples were drawn at 100, 110 and 120 min, deproteinized with methanol, dried, and  $^3\text{H}$  specific activity measured using a scintillation counter. Rates of endogenous glucose production were calculated at steady-state, according to the equations of Steele<sup>2</sup>.

#### **Contribution of pyruvate to gluconeogenesis and TCA cycle flux**

The relative contributions of pyruvate to endogenous glucose production and the oxidation of pyruvate to the overall hepatic TCA cycle flux ( $V_{PDH}/V_{TCA}$ ) were determined in rats infused with  $3-^{13}\text{C}$ -lactate. Each animal was infused for 120 min with a 2-step primed-continuous protocol [prime1:  $358 \mu\text{mol (kg-min)}^{-1} \times 5 \text{ min}$ ; prime2:  $178 \mu\text{mol (kg-min)}^{-1} \times 5 \text{ min}$ ; continuous:  $130 \mu\text{mol (kg-min)}^{-1} \times 115 \text{ min}$ ]. At the end of the experiment the liver was excised and immediately freeze-clamped. Total pyruvate and glutamate enrichments were determined by LC/MS, and glucose enrichments by GC/MS, of liver extracts; positional enrichments were assigned by  $^{13}\text{C}$  NMR at 500 MHz. The contribution of pyruvate to gluconeogenesis was determined from the sum of the enrichments of  $\text{C}_1\text{-C}_2\text{-C}_5\text{-C}_6$ -glucose relative to  $\text{C}_2\text{-C}_3$ -glutamate. The ratio of PDH to TCA cycle flux was calculated assuming  $V_{PDH}/V_{TCA} = (\text{C}_4^*\text{Glu})/(\text{C}_3^*\text{Pyr})$ . The relative anaplerotic to TCA cycle flux was estimated assuming  $V_{ANA}/V_{TCA} = (\text{C}_4^*\text{Glu} - \text{C}_2^*\text{Glu})/(\text{C}_3^*\text{Glu} + \text{C}_2^*\text{Glu} - \text{C}_3^*\text{Pyr} + \text{C}_2^*\text{Pyr})$ .  $\text{C}_x^*$ metabolite denotes the positional  $^{13}\text{C}$ enrichment of a particular metabolite.

### Effects of exogenous propionate

To determine the effects of the provision of exogenous propionate on hepatic metabolism, rats were given an intravenous infusion of propionate at either a low [333  $\mu\text{mol kg}(\text{body-weight})^{-1}$  over 120 min,  $n = 3$ ] or a high dose [666  $\mu\text{mol kg}(\text{body-weight})^{-1}$  over 120 min,  $n = 4$ ] with concurrent assessment of glucose turnover. In order to avoid interference with the  $^{13}\text{C}$  label derived from 1- $^{13}\text{C}$  acetate, [3- $^3\text{H}$ ] glucose was infused at rates of 0.05  $\mu\text{Ci min}^{-1}$  for 120 min to assess rates of glucose turnover. Plasma samples were taken at steady state (100-120 min) for assessment of glucose  $^3\text{H}$  specific activity and rates of glucose turnover were calculated as previously described<sup>3</sup>. The sample size was chosen to detect ~20% differences between the groups, based on the coefficient of variation of previously reported data using this technique<sup>4,5</sup>.

**Table S2.** Steady-state positional  $^{13}\text{C}$ -enrichments of liver glutamate, pyruvate, and glucose in rats ( $n = 4$ ) undergoing a 3- $^{13}\text{C}$  lactate infusion. Endogenous glucose production was determined using the [6,6- $^2\text{H}_2$ ] glucose turnover method. Estimates of the relative contributions of pyruvate to gluconeogenesis, pyruvate flux into the TCA cycle ( $V_{PDH}/V_{TCA}$ ) and the overall TCA cycle flux.

|                                                                                                | Mean | SEM   |
|------------------------------------------------------------------------------------------------|------|-------|
| <b>C<sub>2</sub>+C<sub>3</sub>-Pyruvate APE (%)</b>                                            | 20.3 | ± 1.8 |
| <b>C<sub>2</sub>-Glutamate APE (%)</b>                                                         | 8.1  | ± 0.1 |
| <b>C<sub>3</sub>-Glutamate APE (%)</b>                                                         | 7.3  | ± 0.3 |
| <b>C<sub>4</sub>-Glutamate APE (%)</b>                                                         | 0.5  | ± 0.1 |
| <b>C<sub>1</sub>-Glucose APE (%)</b>                                                           | 5.2  | ± 0.9 |
| <b>C<sub>2</sub>-Glucose APE (%)</b>                                                           | 3.2  | ± 0.1 |
| <b>C<sub>5</sub>-Glucose APE (%)</b>                                                           | 3.4  | ± 0.3 |
| <b>C<sub>6</sub>-Glucose APE (%)</b>                                                           | 4.6  | ± 0.6 |
| <b>endogenous glucose production</b><br>( $\mu\text{mol [g-liver-min]}^{-1}$ ) 3-carbon units  | 2.4  | ± 0.1 |
| <b>contribution of pyruvate</b><br><b>to gluconeogenesis (%)</b>                               | 93.3 | ± 1.3 |
| $V_{PDH}/V_{TCA}$                                                                              | 0.16 | ± 0.1 |
| $V_{ANA}/V_{TCA}$                                                                              | 1.9  | ± 0.4 |
| <b>Estimated <math>V_{TCA}</math></b><br>( $\mu\text{mol [g-liver-min]}^{-1}$ ) 2-carbon units | 1.4  | ± 0.4 |

**Figure S3.** Effect of substrate provision on relative hepatic metabolic fluxes. High dose reflects double the infusion rate described in the supplemental methods (a) Hepatic glucose production in rats infused with low ( $n = 3$ ) or high dose propionate ( $n = 4$ ). (b) Hepatic glucose production in rats infused with low ( $n = 3$ ) or high dose lactate ( $n = 3$ ). (c) Hepatic glucose production in rats infused with low ( $n = 3$ ) or high dose acetate ( $n = 3$ ). (d)  $V_{PC}/V_{TCA}$  in rats infused with low or high dose 3- $^{13}C$  lactate. (e)  $V_{PDH}/V_{TCA}$  in rats infused with low or high dose 3- $^{13}C$  lactate. Statistically significant differences between the low dose and high dose groups subjects were detected by using an unpaired 2-tailed student's t test. A  $P$  value of  $< 0.05$  was considered statistically significant; N.S. indicates non-significant.

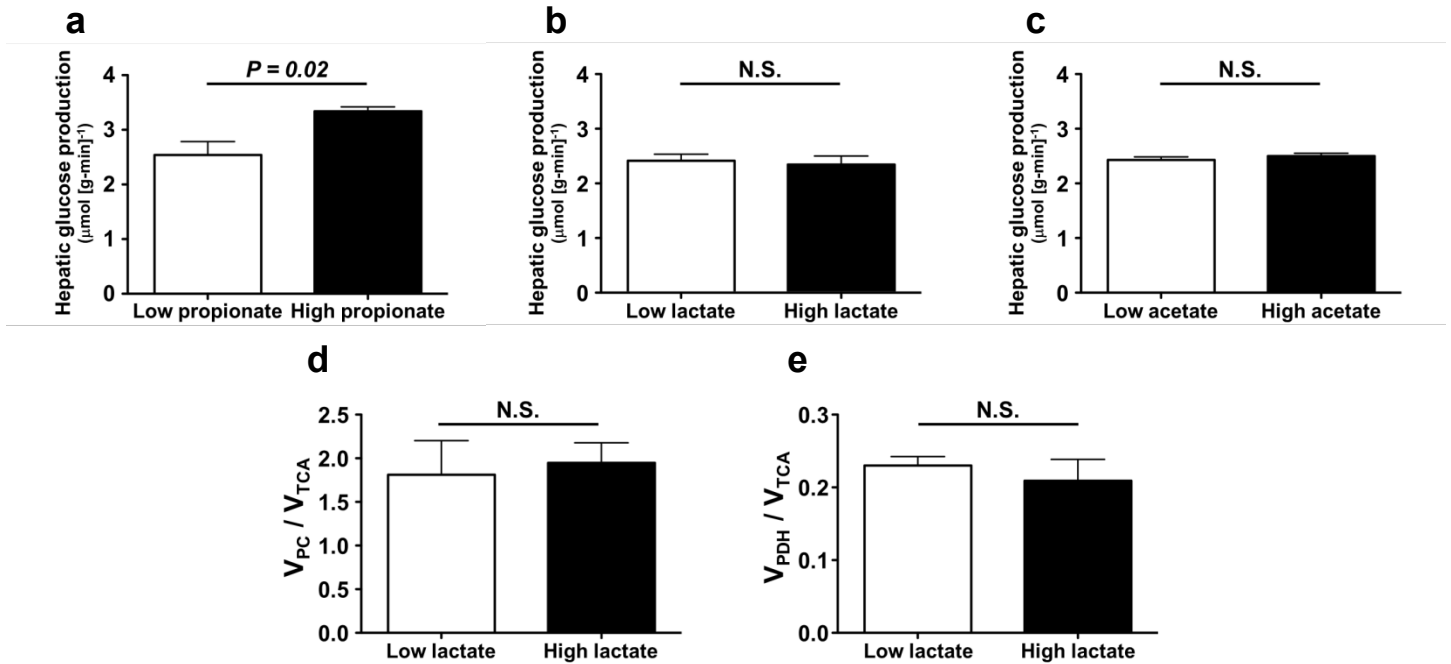

## References

1. Rossetti, L., *et al.* Mechanism by which hyperglycemia inhibits hepatic glucose production in conscious rats. Implications for the pathophysiology of fasting hyperglycemia in diabetes. *J Clin Invest* **92**, 1126-1134 (1993).
2. Steele, R. Influences of glucose loading and of injected insulin on hepatic glucose output. *Ann N Y Acad Sci* **82**, 420-430 (1959).
3. Jornayvaz, F.R., *et al.* Thyroid hormone receptor-alpha gene knockout mice are protected from diet-induced hepatic insulin resistance. *Endocrinology* **153**, 583-591 (2012).
4. Jin, E.S., *et al.* Glucose production, gluconeogenesis, and hepatic tricarboxylic acid cycle fluxes measured by nuclear magnetic resonance analysis of a single glucose derivative. *Anal Biochem* **327**, 149-155 (2004).
5. Jones, J.G., *et al.* Measurement of gluconeogenesis and pyruvate recycling in the rat liver: a simple analysis of glucose and glutamate isotopomers during metabolism of [1,2,3-( $^{13}C$ )]propionate. *FEBS Lett* **412**, 131-137 (1997).
